# Supplementary material for: Educational Impact of a Research and Mentoring Symposium Emphasizing Formative Feedback for Medical Students and Early Career Doctors in Africa
Source: bioRxiv or medRxiv preprint supplement (doi:10.1101/2023.11.03.23298036), 2026-07-07
Supplement: Supplementary file [file media-1.pdf]

Supplementary Table ST1. Keynote Presenters at the 2022 Symposium

| <b>Keynote Title</b>                                                                             | <b>Speaker</b>                                     | <b>Professional Title and Affiliation</b>                                                                                                                                                                                                                                       | <b>Country</b>           |
|--------------------------------------------------------------------------------------------------|----------------------------------------------------|---------------------------------------------------------------------------------------------------------------------------------------------------------------------------------------------------------------------------------------------------------------------------------|--------------------------|
| <b>The State of Health Research in Africa: Current Challenges, Solutions, and Opportunities</b>  | Dr. Patricia Shinondo, MD                          | Pediatric Surgeon, Levy Mwanawasa University Teaching Hospital, Lusaka, Zambia; Vice President, Zambia Medical Association                                                                                                                                                      | Zambia                   |
| <b>Mentorship and Mentorship Opportunities - Choosing a Mentor</b>                               | Professor Nazik Hammad, MD, MSc, MEHP, FACP        | Professor, Division of Medical Oncology, Queen's University, Kingston Health Science Center, Kingston, Ontario, Canada                                                                                                                                                          | Canada                   |
| <b>Translating Research into Policy Advancements</b>                                             | Professor Ruanne Barnabas, MD                      | Chief, Division of Infectious Diseases, Massachusetts General Hospital, Boston, Massachusetts, USA; Professor of Medicine, Harvard Medical School, Boston, Massachusetts, USA; Professor of Epidemiology, Harvard T.H. Chan School of Public Health, Boston, Massachusetts, USA | USA                      |
| <b>Getting Started in Private Practice - The Do's and Don'ts'</b>                                | Dr. Emilia Marsden, MBChB, MMed Paeds              | Pediatrician; Managing Director and Board Member, Pendleton Family Practice, Lusaka, Zambia                                                                                                                                                                                     | Zambia                   |
| <b>Advancing Gender Equity in Academia: Challenges, Strategies, and Institutional Change</b>     | Dr. Miriam Mutebi, MD, MMed Surg, MSc              | AORTIC President-Elect; Consultant Breast Surgical Oncologist and Assistant Professor, Aga Khan University Hospital, Nairobi, Kenya                                                                                                                                             | Kenya                    |
| <b>Mental Health in Medical School</b>                                                           | Dr. Naeem Dalal, MD, BScHB, MBChB, MMed Psychiatry | Psychiatrist, University Teaching Hospital, Lusaka, Zambia; Public Health Chairperson, Zambia Medical Association                                                                                                                                                               | Zambia                   |
| <b>The Power of You - Identifying your Strengths and Getting Started in Achieving your Goals</b> | Olive Strachan, MBE                                | CEO, Olive Strachan Consultancy                                                                                                                                                                                                                                                 | United Kingdom; Dominica |

Supplementary Table ST2. Data associated with the satisfaction of trainees with research training and opportunities in medical school and self-reported benefits of attending the symposium.

(A) Trainees' (n=87) satisfaction with access to medical training, support, and mentorship at their home institutions.

| <b>Question</b>                                                                                  | <b>(No Response)</b> | <b>Strongly disagree</b> | <b>Somewhat disagree</b> | <b>Neither agree nor disagree</b> | <b>Somewhat agree</b> | <b>Strongly agree</b> |
|--------------------------------------------------------------------------------------------------|----------------------|--------------------------|--------------------------|-----------------------------------|-----------------------|-----------------------|
| <b>My school encourages students to pursue research as part of their training</b>                | 5 (5.7%)             | 10 (11.5%)               | 18 (20.7%)               | 8 (9.2%)                          | 20 (23%)              | 26 (29.9%)            |
| <b>My school provides research opportunities as part of training</b>                             | 5 (5.7%)             | 16 (18.4%)               | 9 (10.3%)                | 10 (11.5%)                        | 27 (31%)              | 20 (23%)              |
| <b>My school provides adequate training in the design and conduct of research</b>                | 5 (5.7%)             | 14 (16.1%)               | 20 (23%)                 | 14 (16.1%)                        | 27 (31%)              | 7 (8%)                |
| <b>Students at my school are satisfied with their access to research training and mentorship</b> | 5 (5.7%)             | 23 (26.4%)               | 25 (28.7%)               | 15 (17.2%)                        | 15 (17.2%)            | 4 (4.6%)              |
| <b>I have adequate access to research mentorship through my school</b>                           | 6 (6.9%)             | 20 (23%)                 | 22 (25.3%)               | 16 (18.4%)                        | 19 (21.8%)            | 4 (4.6%)              |

(B) Impact of the symposium on trainee interest in research.

| <b>Question</b>                                                       | <b>(No Response)</b> | <b>Strongly disagree</b> | <b>Somewhat disagree</b> | <b>Neither agree nor disagree</b> | <b>Somewhat agree</b> | <b>Strongly agree</b> |
|-----------------------------------------------------------------------|----------------------|--------------------------|--------------------------|-----------------------------------|-----------------------|-----------------------|
| <b>This symposium increased my interest in research</b>               | 2 (2.3%)             | 15 (17.2%)               | 0 (0%)                   | 1 (1.1%)                          | 4 (4.6%)              | 65 (74.7%)            |
| <b>Research topics were informative and educational</b>               | 3 (3.4%)             | 14 (16.1%)               | 1 (1.1%)                 | 0 (0%)                            | 4 (4.6%)              | 65 (74.7%)            |
| <b>Listening to others present was inspiring</b>                      | 3 (3.4%)             | 14 (16.1%)               | 1 (1.1%)                 | 1 (1.1%)                          | 7 (8%)                | 61 (70.1%)            |
| <b>Listening to feedback from the judges inspired my own research</b> | 2 (2.3%)             | 13 (14.9%)               | 0 (0%)                   | 1 (1.1%)                          | 5 (5.7%)              | 66 (75.9%)            |

(C) Impact of the symposium on trainee interest in submitting to future conferences.

| Question                                                                                       | (No Response) | Extremely unlikely | Somewhat unlikely | Neither likely nor unlikely | Somewhat likely | Extremely likely |
|------------------------------------------------------------------------------------------------|---------------|--------------------|-------------------|-----------------------------|-----------------|------------------|
| <b>This symposium increased the likelihood I will submit an abstract to another conference</b> | 4 (4.6%)      | 1 (1.1%)           | 1 (1.1%)          | 1 (1.1%)                    | 10 (11.5%)      | 70 (80.5%)       |

(D) Trainees self-reported benefit from symposium keynote presentations.

| Question                                          | (No Response) | Poor   | Fair     | Good     | Very Good  | Excellent  |
|---------------------------------------------------|---------------|--------|----------|----------|------------|------------|
| <b>I benefited from the keynote presentations</b> | 2 (2.3%)      | 0 (0%) | 1 (1.1%) | 1 (1.1%) | 15 (17.2%) | 68 (78.2%) |

Supplementary Table ST3. Self-reported benefits of the symposium for trainee abstract presenters (n=28)

(A) Impact of the presenting experience on presenter research future directions, scientific networking and feedback, and desire to participate in future conferences.

| Question                                                                             | No | Yes |        |
|--------------------------------------------------------------------------------------|----|-----|--------|
| <b>This symposium gave me new ideas to extend my current research</b>                | 2  | 26  | 92.86% |
| <b>This was my first time receiving formative feedback from conference judges</b>    | 6  | 22  | 78.57% |
| <b>Fellow attendees reached out with feedback or questions after my presentation</b> | 4  | 24  | 85.71% |
| <b>I will submit my work to future conferences</b>                                   | 1  | 27  | 96.43% |

(B) Self-perceived benefit of the symposium on the quality of presenters' work.

| Question                                                                        | Neither true<br>nor false | Probably<br>true | Definitely<br>true |        |
|---------------------------------------------------------------------------------|---------------------------|------------------|--------------------|--------|
| <b>The quality of my work has been improved by presenting at this symposium</b> | 1                         | 5                | 22                 | 78.57% |

(C) Self-perceived aspects of presenters' projects that improved due to presenting at the symposium (multiple responses permitted).

| Presenting at This Symposium Gave Me Ways to Improve | Total Participants | Number of Presenters | % Presenters |
|------------------------------------------------------|--------------------|----------------------|--------------|
| <b>Writing / Presentation</b>                        | 28                 | 24                   | 86%          |
| <b>Interpretation</b>                                | 28                 | 18                   | 64%          |
| <b>Data analysis</b>                                 | 28                 | 16                   | 57%          |
| <b>Data collection</b>                               | 28                 | 9                    | 32%          |
| <b>Other</b>                                         | 28                 | 1                    | 4%           |
